# Supplementary material
Source: PubMed Central journal article supplement (PMC7769592)
Supplement: NIHMS1641139-supplement-Supp1.pdf [file NIHMS1641139-supplement-Supp1.pdf]

*Corrigendum*

Corrigendum to “Evidence That Established Lung Cancer Mortality Disparities in American Indians Are Not Due to Lung Cancer Genetic Testing and Targeted Therapy Disparities” [Clinical Lung Cancer. 2020 May;21(3): e164-e168]

Abbie Begnaud,<sup>1</sup> Ping Yang,<sup>2</sup> Camille Robichaux,<sup>1,\*</sup> Nathan Rubin,<sup>3</sup> Robert Kratzke,<sup>1</sup> Anne Melzer,<sup>5</sup> Constantin Aliferis,<sup>1</sup> Pamala Jacobson<sup>4</sup>

<sup>1</sup>Department of Medicine

<sup>2</sup>Departments of Internal Medicine and Medical Genetics, Mayo Clinic, Scottsdale, AZ

<sup>3</sup>Biostatistics Core, Masonic Cancer Center, University of Minnesota, Minneapolis, MN

<sup>4</sup>Experimental and Clinical Pharmacology, University of Minnesota, Minneapolis, MN

<sup>5</sup>Section of Pulmonary and Critical Care, Minneapolis VA Healthcare System, Minneapolis, MN

The authors regret that we failed to acknowledge collaborators without whom this project would have been impossible: Ashley Benner, MPH; Michelle DeMist, PMP; Hongfang Liu PhD; Anne M. Murray, MD, MSc (Hennepin HealthCare, Minneapolis, MN); Douglas J Rausch, MD MSc (Hennepin HealthCare, Minneapolis, MN); Gretchen Sieger; Liwei Wang, MD, PhD; Stephen C Waring, DVM, PhD, FACE

This research was supported by the National Institutes of Health’s National Center for Advancing Translational Sciences, grant UL1TR002494. The content is solely the responsibility of the authors and does not necessarily represent the official views of the National Institutes of Health’s National Center for Advancing Translational Sciences.

The authors would like to apologise for any inconvenience caused.

\*Address for correspondence: Camille Robichaux, MD, Department of Medicine, University of Minnesota, 420 Delaware St SE, Minneapolis, MN 55455 Email address: [robic020@umn.edu](mailto:robic020@umn.edu).
